# Supplementary material for: Determination of lentiviral titer by surface enhanced Raman scattering
Source: Royal Society of Chemistry journal article supplement (doi:10.1039/d2ay00041e), 2022-01-01
Supplement: d2ay00041e1.pdf [file d2ay00041e1.pdf]

## Supplemental Information: Determination of Lentiviral Titer by Surface Enhanced Raman Scattering

Courtney J. Morder<sup>1</sup>, Brian T. Scarpitti<sup>1</sup>, Karin M. Balss<sup>2</sup>, and Zachary D. Schultz<sup>1\*</sup>

1. Department of Chemistry and Biochemistry, The Ohio State University, Columbus, OH 43210
2. Advanced Technology Center of Excellence, Janssen Supply Chain, Spring House, PA 19477, USA

\*corresponding author's email: schultz.133@osu.edu

### Table of Contents

|                                                                                                        |     |
|--------------------------------------------------------------------------------------------------------|-----|
| Figure S1: Images of 3D printed SERS flow cell .....                                                   | S-2 |
| Figure S2: SERS spectra of lentivirus without GFP vector at various concentrations .....               | S-2 |
| Figure S3: 2D scores plots of MCR model used for quantification of particles containing GFP gene ..... | S-3 |
| Figure S4: Spectra of component 2 and lentivirus encoding for GFP at 50,000 TU/mL .....                | S-3 |
| Table S1: Peak assignments for component 2 of MCR model created using gold substrates .....            | S-4 |
| Table S2: Peak assignments for component 3 of MCR model created using silver substrates.....           | S-4 |

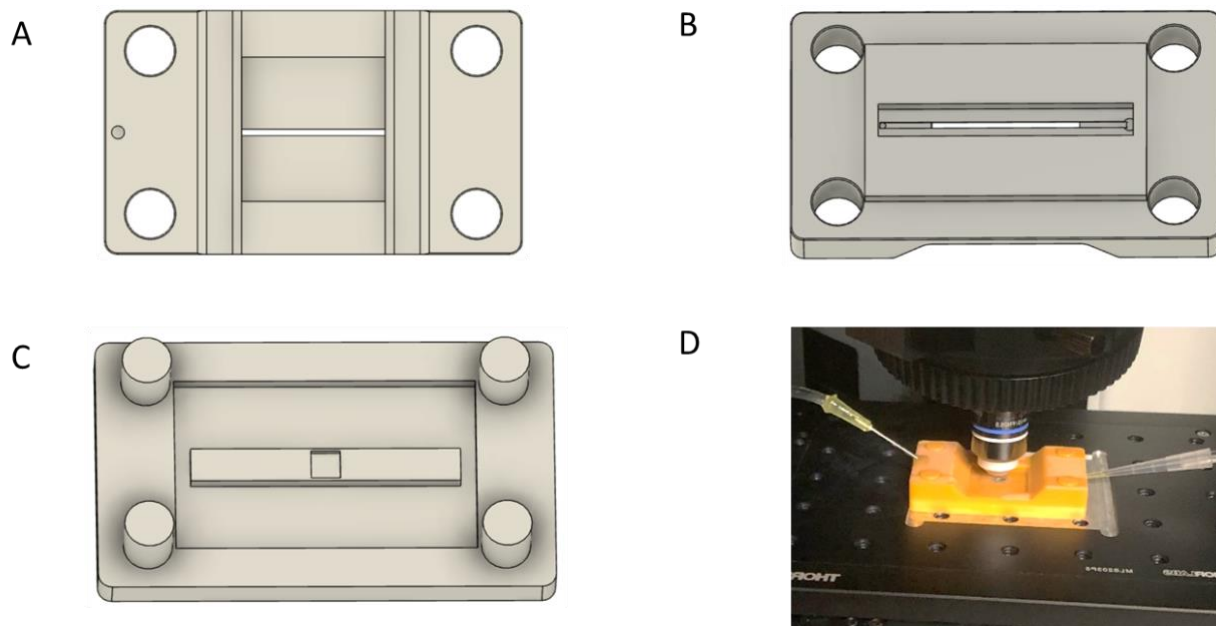

Figure S1. Diagram of the 3D printed flow cell set up used for experiments with silver substrates. CAD diagrams of the top piece (A) top view and (B) bottom view show the inlet for the sample and the flow channel. The bottom piece (C) has a slot cut out to hold a commercial SERS substrate. (D) An image of the actual setup after the two pieces are glued together.

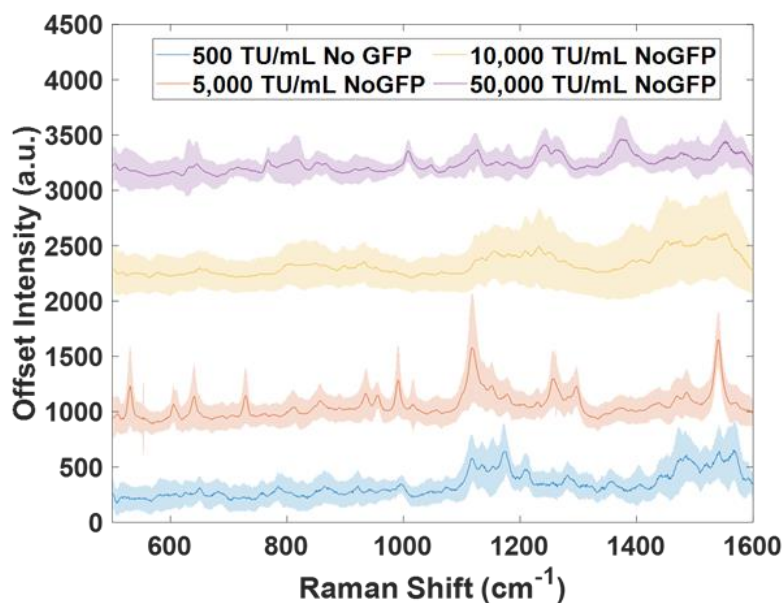

Figure S2. SERS spectra of LentiArray CRISPR negative control lentivirus without GFP at various concentrations. The shaded region shows the standard deviation across all spectra acquired on gold substrates.

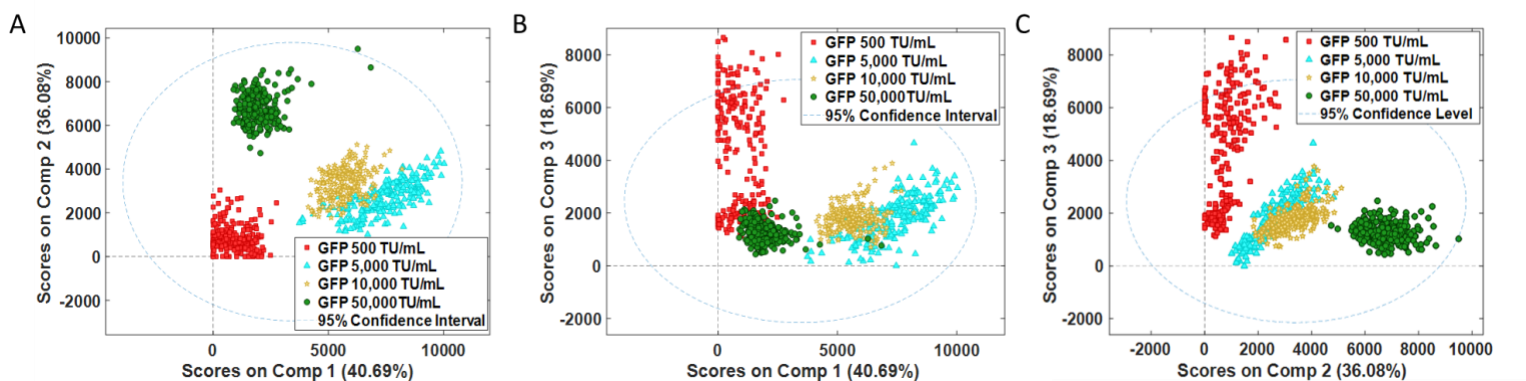

Figure S3. 2D projections of the scores on each component of MCR model used to quantify lentivirus particles containing the GFP gene.

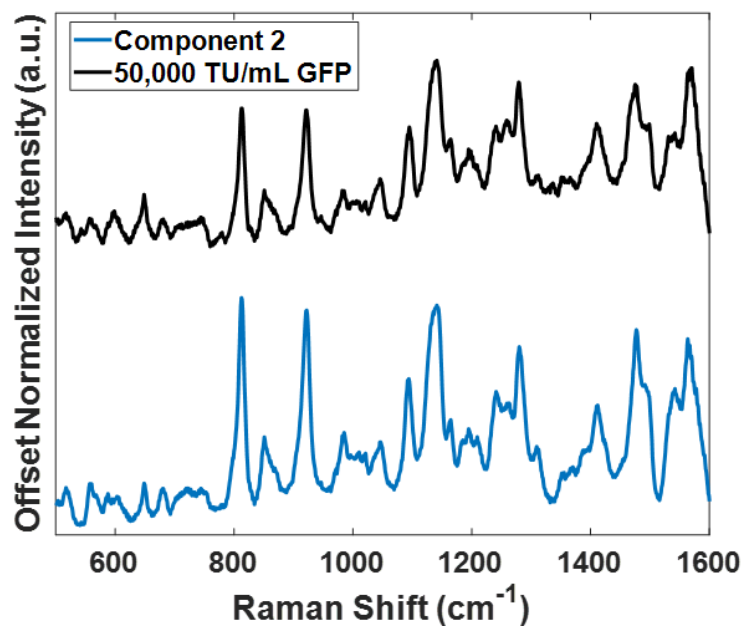

Figure S4. Average SERS spectra of highest concentration of lentivirus particles with the GFP gene (black) and the component spectrum of the MCR model used to quantify the particles with the GFP gene (blue).

| SERS Band (cm <sup>-1</sup> ) | Peak Assignments                    |
|-------------------------------|-------------------------------------|
| 649                           | Guanine <sup>1</sup>                |
| 681                           | Adenine <sup>2</sup>                |
| 812                           | Phosphate Backbone <sup>1</sup>     |
| 851                           | Tyrosine <sup>1</sup>               |
| 921                           | Adenine <sup>2</sup>                |
| 985                           | Alanine <sup>3</sup>                |
| 1006                          | Phenylalanine <sup>4</sup>          |
| 1046                          | Cytosine <sup>1,5</sup>             |
| 1095                          | Phosphate backbone <sup>5,6</sup>   |
| 1141                          | Phenylalanine <sup>3</sup>          |
| 1195                          | Cytosine <sup>2</sup>               |
| 1241                          | Amide III <sup>4</sup>              |
| 1259                          | Amide III <sup>4</sup>              |
| 1280                          | Arginine <sup>3</sup>               |
| 1338                          | Adenine <sup>2</sup>                |
| 1354                          | Tryptophan <sup>4</sup>             |
| 1410                          | Histidine <sup>3</sup>              |
| 1476                          | Glutamate/Aspartate <sup>3</sup>    |
| 1540                          | Adenine <sup>2</sup>                |
| 1567                          | Phenylalanine/Tyrosine <sup>3</sup> |

Table S1. Peak assignments for component 2 loading spectrum of the MCR model developed using SERS spectra acquired on gold substrates.

| SERS Band (cm <sup>-1</sup> ) | Peak Assignments                         |
|-------------------------------|------------------------------------------|
| 623                           | Guanine <sup>5</sup>                     |
| 632                           | Tyrosine <sup>1</sup>                    |
| 687                           | Adenine <sup>2</sup>                     |
| 709                           | Cytosine <sup>2</sup>                    |
| 777                           | Cytosine/Uracil <sup>7</sup>             |
| 794                           | Cytosine <sup>2</sup>                    |
| 830                           | Tyrosine <sup>7</sup>                    |
| 862                           | Tyrosine <sup>7</sup>                    |
| 907                           | Uracil <sup>2</sup>                      |
| 1012                          | Tryptophan <sup>7,8</sup>                |
| 1077                          | Threonine <sup>7</sup>                   |
| 1128                          | Adenine <sup>9</sup>                     |
| 1155                          | Guanine <sup>9</sup>                     |
| 1178                          | Ribose Phosphate <sup>7</sup>            |
| 1217                          | Uracil <sup>2</sup>                      |
| 1260                          | Amide III <sup>4</sup>                   |
| 1281                          | Arginine <sup>3</sup>                    |
| 1298                          | Uracil <sup>2</sup>                      |
| 1354                          | Tryptophan <sup>4</sup>                  |
| 1427                          | Cytosine <sup>2</sup>                    |
| 1447                          | CH2 deformation of proteins <sup>1</sup> |

Table S2. Peak assignments for component 3 loading spectrum of the MCR model created using SERS spectra acquired on silver substrates.

## References

1. Shanmukh, S.; Jones, L.; Driskell, J.; Zhao, Y.; Dluhy, R.; Tripp, R. A., Rapid and Sensitive Detection of Respiratory Virus Molecular Signatures Using a Silver Nanorod Array SERS Substrate. *Nano Letters* **2006**, *6* (11), 2630-2636.
2. Suh, J. S.; Moskovits, M., Surface-enhanced Raman spectroscopy of amino acids and nucleotide bases adsorbed on silver. *Journal of the American Chemical Society* **1986**, *108* (16), 4711-4718.
3. Negri, P.; Schultz, Z. D., Online SERS detection of the 20 proteinogenic l-amino acids separated by capillary zone electrophoresis. *The Analyst* **2014**, *139* (22), 5989-5998.
4. Ashton, L.; Blanch, E. W., pH-induced conformational transitions in  $\alpha$ -lactalbumin investigated with two-dimensional Raman correlation variance plots and moving windows. *Journal of Molecular Structure* **2010**, *974* (1-3), 132-138.
5. Negri, P.; Dluhy, R. A., Detection of genetic markers related to high pathogenicity in influenza by SERS. *The Analyst* **2013**, *138* (17).
6. Barhoumi A.; Zhang D.; Tam F.; Halas N. J., Surface-enhanced Raman spectroscopy of DNA. *J Am Chem Soc.* **2008**, *130* (16). 5523-5529.
7. Verduin, B. J. M.; Prescott, B.; Thomas, G. J., RNA-protein interactions and secondary structures of cowpea chlorotic mottle virus for in vitro assembly. *Biochemistry* **1984**, *23* (19), 4301-4308.
8. Sloan-Dennison, S.; Zoltowski, C. M.; El-Khoury, P. Z.; Schultz, Z. D., Surface Enhanced Raman Scattering Selectivity in Proteins Arises from Electron Capture and Resonant Enhancement of Radical Species. *The Journal of Physical Chemistry C* **2020**, *124* (17), 9548-9558.
9. Otto, C.; van den Tweel, T. J. J.; de Mul, F. F. M.; Greve, J., Surface-enhanced Raman Spectroscopy of DNA bases. *J. Raman Spectrosc.*, **1986**, *17* (3), 289-298.
